# Supplementary material for: Investigating the role of structural water on the electrochemical properties of α-V2O5 through density functional theory
Source: Royal Society of Chemistry journal article supplement (doi:10.1039/d1cp05291h), 2022-01-01
Supplement: d1cp05291h1.pdf [file d1cp05291h1.pdf]

## Investigating the Role of Structural Water on the Electrochemical Properties of $\alpha$ - $V_2O_5$ through Density Functional Theory

Kaveen Sandagiripathira,<sup>1</sup> Mohammad Ali Moghaddasi,<sup>1</sup> Robert Shepard,<sup>1,2\*</sup> Manuel Smeu<sup>1\*</sup>

<sup>1</sup>Department of Physics, Binghamton University – SUNY, 4400 Vestal Parkway East, Binghamton, New York 13902, United States

<sup>2</sup>Department of Mathematics and Technology, Alvernia University, 400 Saint Bernardine Street, Reading, Pennsylvania 19607, United States

\* Corresponding author: [robert.shepard@alvernia.edu](mailto:robert.shepard@alvernia.edu) (RS), [msmeu@binghamton.edu](mailto:msmeu@binghamton.edu) (MS)

### Diffusion Calculations

The physical diffusion pathway for Mg in the  $2 \times 1 \times 1$  supercell of  $\alpha$ - $V_2O_5$  without  $H_2O$  molecules present is shown in Fig. S1. The same diffusion pathway was used for all ions and structures with  $H_2O$  present. The energy barriers for all ions investigated as a function of the path distance for a)  $V_2O_5$  and b)  $V_2O_5-(H_2O)_1$  are shown in Fig. S2. The energy barriers for Zn and Al in  $V_2O_5-(H_2O)_1$  are not shown since such calculations failed to converge.

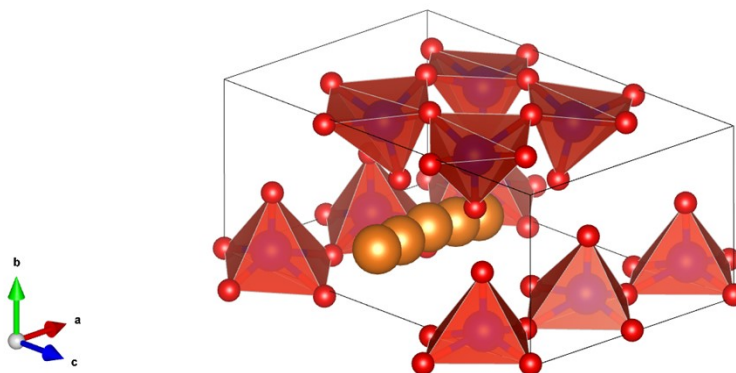

**Fig. S1:** The ion migration pathway along the  $a$  lattice vector for  $\alpha$ - $V_2O_5$  with  $H_2O$  molecules not shown.

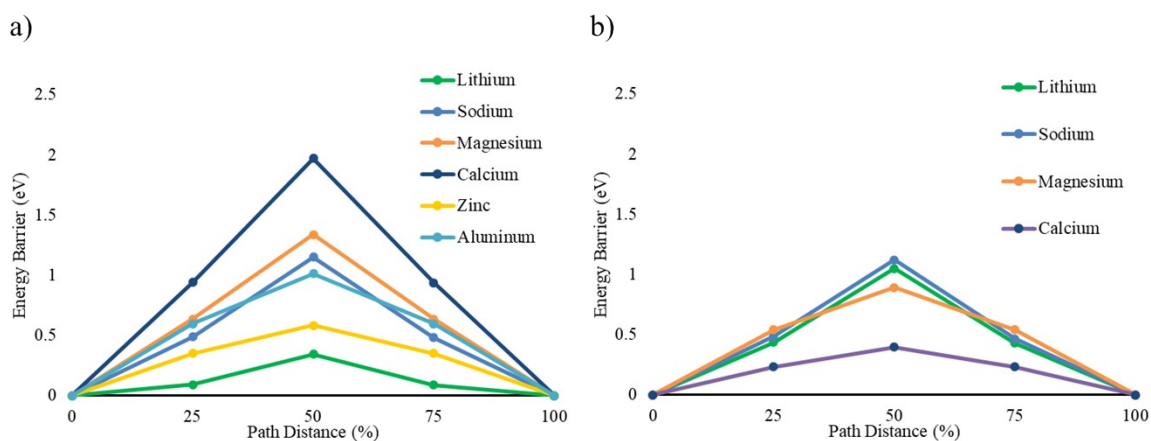

**Fig S2:** Corresponding ion migration energy barriers in  $\alpha$ - $V_2O_5$  utilizing PBE-D3 for a)  $V_2O_5$  and b)  $V_2O_5$ - $(H_2O)_1$ .
